# Supplementary material for: Hemodynamic Status During Endovascular Stroke Treatment: Association of Blood Pressure with Functional Outcome
Source: PubMed Central journal article supplement (PMC8692300; doi:10.1007/s12028-021-01229-w), 2021-06-17
Supplement: 12028_2021_1229_MOESM1_ESM.pdf [file 12028_2021_1229_MOESM1_ESM.pdf]

# Supplementary material

Table I. Baseline, procedural and outcome characteristics of KEEP SIMPLEST total cohort

|                                                                              |              |
|------------------------------------------------------------------------------|--------------|
| Demographic characteristics (n= 161)                                         |              |
| Age, mean (SD), y                                                            | 75.9 (11.3)  |
| Female sex - no. (%)                                                         | 96 (59.6)    |
| Premedication - no. (%)                                                      |              |
| Antiplatelet therapy                                                         | 58 (36.0)    |
| Oral anticoagulant therapy                                                   | 27 (16.8)    |
| Statin                                                                       | 33 (27.3)    |
| Vascular risk factors - no. (%)                                              |              |
| Hypertension                                                                 | 131 (81.4)   |
| Diabetes mellitus                                                            | 37 (23.0)    |
| Hyperlipidemia                                                               | 46 (28.6)    |
| Smoking                                                                      | 24 (14.9)    |
| Atrial fibrillation                                                          | 54 (33.5)    |
| Peripheral artery occlusive disease                                          | 14 (8.7)     |
| Premorbid mRS - no. (%)                                                      |              |
| 0                                                                            | 50 (31.1)    |
| 1                                                                            | 41 (25.5)    |
| 2                                                                            | 23 (14.3)    |
| >2                                                                           | 47 (29.2)    |
| NIHSS                                                                        |              |
| Mean (SD)                                                                    | 14.2 (7.6)   |
| Median (IQR)                                                                 | 14 (12)      |
| Site of arterial occlusion - no. (%)                                         |              |
| ICA occlusion                                                                | 51 (31.1)    |
| MCA occlusion                                                                | 114 (70.8)   |
| ICA + MCA occlusion                                                          | 43 (44.1)    |
| Left side                                                                    | 82 (50.1)    |
| Treatment - no. (%)                                                          |              |
| Alteplase only                                                               | 8 (5.0)      |
| Alteplase + EST                                                              | 90 (55.9)    |
| EST only                                                                     | 63 (39.1)    |
| Door-to-needle time in minutes - mean (SD) *                                 | 31.8 (13.0)  |
| Pretreatment ASPECTS – no. (%)<br>n = 160 (ASPECTS was missing in 1 patient) |              |
| 8-10                                                                         | 108 (67.5)   |
| 6-7                                                                          | 35 (21.9)    |
| <6                                                                           | 17 (10.6)    |
| Median (IQR)                                                                 | 7 (3)        |
| Peri-interventional aspects - no. (%)                                        |              |
| Conversion to general anesthesia                                             | 20 (12.4)    |
| Need of sedation                                                             | 148 (91.2)   |
| Need of catecholamines                                                       | 53 (30.9)    |
| MAP < 70 mmHg                                                                | 10 (6.2)     |
| Mean infusion dose/rate of (analgo)sedative medication and vasopressors      |              |
| Propofol (n=145)                                                             | 2.0 mg/min   |
| Esketamine (n=133)                                                           | 1.0 mg/min   |
| Norepinephrine (n=49)                                                        | 215.8 ug/min |
| Remifentanyl (n=16)                                                          | 205 ug/min   |

\*Data was missing in 49 patients

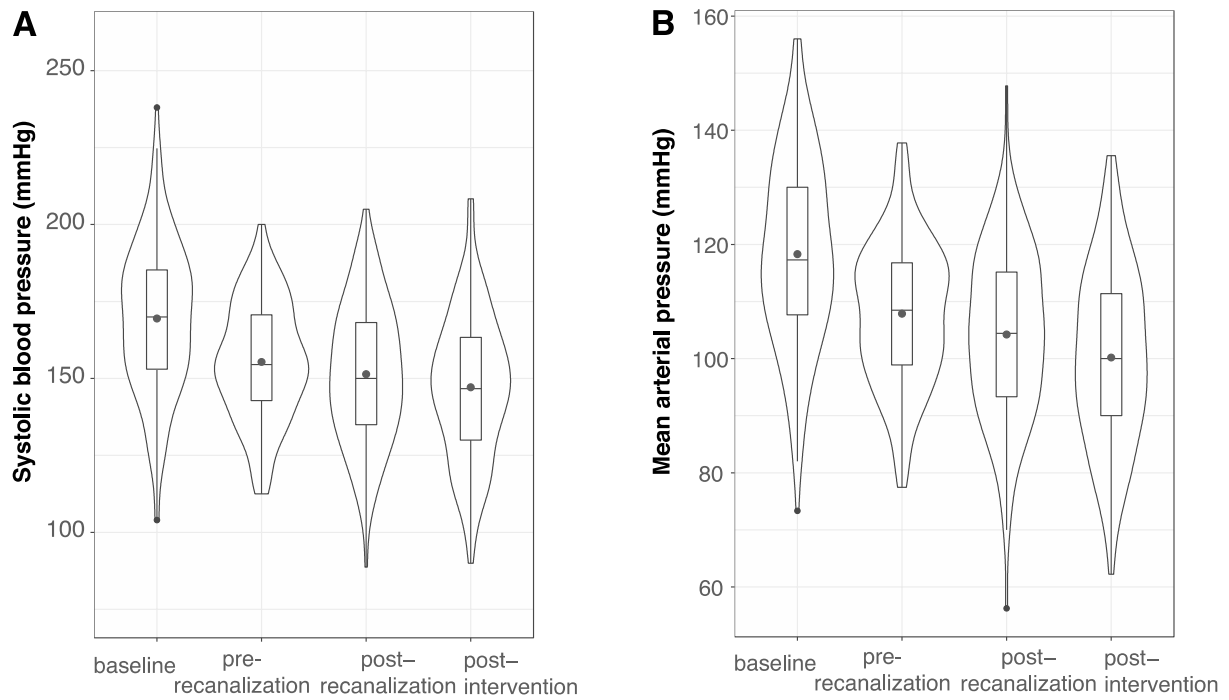

Figure I. Violin plots of systolic blood pressure (A) and mean arterial pressure (B) during different phases of endovascular treatment.

Table II. Reasons for conversion to general anesthesia

| Reason, n (%)             | Whole study population | Successfully reperfused subgroup |
|---------------------------|------------------------|----------------------------------|
| Agitation                 | 11 (55.0)              | 9 (64.3)                         |
| Vomiting                  | 5 (25.0)               | 3 (21.4)                         |
| Aspiration                | 2 (10.0)               | 1 (7.1)                          |
| Respiratory insufficiency | 7 (35.0)               | 6 (42.9)                         |
| other                     | 1 (5.0)*               | 0 (0)                            |

\* one patient was converted to general anesthesia for intracranial stent placement

Table III. Blood pressure in each phase in patients without successful reperfusion (TICI  $\leq$  2a)

| Phase               | Mean SBP (SD) in mmHg | Mean DBP (SD) in mmHg | Mean MAP (SD) in mmHg | n  |
|---------------------|-----------------------|-----------------------|-----------------------|----|
| Baseline            | 175.6 (29.2)          | 94.4 (19.8)           | 121.1 (20.8)          | 22 |
| Pre-recanalization  | 157.7 (25.4)          | 86.2 (13.1)           | 110.0 (15.5)          |    |
| Post-recanalization | 148.7 (22.1)          | 82.8 (12.8)           | 104.8 (14.1)          |    |
| Post-intervention   | 151.6 (17.4)          | 80.6 (13.1)           | 104.2 (13.1)          |    |

DBP, diastolic blood pressure; MAP, mean arterial pressure; SBP, systolic blood pressure

Table IV. Baseline and pre-recanalization blood pressure and its association with successful recanalization (TICI 2b-3)

|                                                            | OR    | lower 95-CI limit | upper 95-CI limit | p-value |
|------------------------------------------------------------|-------|-------------------|-------------------|---------|
| <b>MAP as covariable during baseline</b>                   |       |                   |                   |         |
| MAP                                                        | 0.841 | 0.486             | 1.438             | 0.528   |
| HR                                                         | 1.033 | 0.647             | 1.709             | 0.894   |
| Propofol                                                   | 0.572 | 0.320             | 1.012             | 0.052   |
| Norepinephrine                                             | 2.001 | 0.506             | 9.965             | 0.354   |
| Esketamine                                                 | 0.787 | 0.433             | 1.394             | 0.415   |
| NIHSS baseline                                             | 1.133 | 0.643             | 2.043             | 0.669   |
| ASPECTS                                                    | 0.648 | 0.354             | 1.109             | 0.131   |
| General anesthesia                                         | 0.289 | 0.051             | 1.506             | 0.143   |
| <b>SBP und DBP as covariables during baseline</b>          |       |                   |                   |         |
| SBP                                                        | 0.768 | 0.409             | 1.433             | 0.406   |
| DBP                                                        | 1.093 | 0.536             | 2.269             | 0.808   |
| HR                                                         | 0.966 | 0.574             | 1.663             | 0.897   |
| Propofol                                                   | 0.563 | 0.313             | 1.002             | 0.048   |
| Norepinephrine                                             | 1.940 | 0.492             | 9.638             | 0.375   |
| Esketamine                                                 | 0.810 | 0.442             | 1.454             | 0.483   |
| NIHSS baseline                                             | 1.143 | 0.648             | 2.067             | 0.648   |
| ASPECTS                                                    | 0.656 | 0.356             | 1.133             | 0.148   |
| General anesthesia                                         | 0.259 | 0.043             | 1.399             | 0.120   |
| <b>MAP as covariable during pre-recanalization</b>         |       |                   |                   |         |
| MAP                                                        | 0.630 | 0.357             | 1.075             | 0.097   |
| HR                                                         | 1.077 | 0.621             | 1.957             | 0.797   |
| Propofol                                                   | 0.571 | 0.323             | 1.007             | 0.049   |
| Norepinephrine                                             | 1.952 | 0.467             | 10.419            | 0.391   |
| Esketamine                                                 | 0.803 | 0.441             | 1.404             | 0.450   |
| NIHSS baseline                                             | 1.072 | 0.618             | 1.919             | 0.808   |
| ASPECTS                                                    | 0.639 | 0.344             | 1.109             | 0.129   |
| General anesthesia                                         | 0.223 | 0.036             | 1.210             | 0.088   |
| <b>SBP und DBP as covariable during pre-recanalization</b> |       |                   |                   |         |
| SBP                                                        | 0.651 | 0.316             | 1.322             | 0.236   |
| DBP                                                        | 0.919 | 0.439             | 1.899             | 0.819   |
| HR                                                         | 1.010 | 0.551             | 1.904             | 0.975   |
| Propofol                                                   | 0.551 | 0.304             | 0.985             | 0.043   |
| Norepinephrine                                             | 1.870 | 0.440             | 10.055            | 0.425   |
| Esketamine                                                 | 0.807 | 0.442             | 1.414             | 0.462   |
| NIHSS baseline                                             | 1.082 | 0.623             | 1.933             | 0.783   |
| ASPECTS                                                    | 0.645 | 0.345             | 1.126             | 0.142   |
| General anesthesia                                         | 9.755 | 5.082             | 21.260            | 0.078   |

ASPECTS, Alberta stroke program early CT score; DBP, diastolic blood pressure; HR, heart rate; MAP, mean arterial pressure; NIHSS, national institutes of health stroke scale; SBP, systolic blood pressure

Table V. Blood pressure and its association with NIHSS change after 24 hours

|                                   | Estimates | 95% CI         | p-value |
|-----------------------------------|-----------|----------------|---------|
| <b>Baseline phase</b>             |           |                |         |
| <b>SBP and DBP as covariables</b> |           |                |         |
| SBP                               | 0.12      | [0.04; 0.19]   | 0.002   |
| DBP                               | -0.08     | [-0.21; 0.04]  | 0.185   |
| HR                                | 0.03      | [-0.05; 0.11]  | 0.511   |
| NIHSS baseline                    | -0.37     | [-0.57; -0.16] | 0.001   |
| ASPECTS                           | -0.72     | [-1.63; 0.20]  | 0.124   |
| General anesthesia                | 6.03      | [1.21; 10.84]  | 0.015   |
| <b>MAP as covariable</b>          |           |                |         |
| MAP                               | 0.09      | [0.00; 0.18]   | 0.063   |
| HR                                | -0.02     | [-0.09; 0.06]  | 0.666   |
| NIHSS baseline                    | -0.37     | [-0.58; -0.15] | 0.001   |
| ASPECTS                           | -0.58     | [-1.51; 0.36]  | 0.223   |
| General anesthesia                | 5.06      | [0.22; 9.91]   | 0.041   |
| <b>Pre-recanalization phase</b>   |           |                |         |
| <b>SBP and DBP as covariables</b> |           |                |         |
| SBP                               | 0.18      | [0.08; 0.29]   | <0.001  |
| DBP                               | -0.19     | [-0.36; -0.02] | 0.029   |
| HR                                | 0.04      | [-0.06; 0.13]  | 0.453   |
| Propofol                          | 0.00      | [-0.01; 0.02]  | 0.568   |
| Norepinephrine                    | -0.30     | [-4.16; 3.57]  | 0.881   |
| Esketamine                        | 0.03      | [0.00; 0.05]   | 0.027   |
| NIHSS baseline                    | -0.35     | [-0.55; -0.15] | 0.001   |
| ASPECTS                           | -0.81     | [-1.69; 0.07]  | 0.073   |
| General anesthesia                | 3.70      | [-1.84; 9.24]  | 0.191   |
| <b>MAP as covariable</b>          |           |                |         |
| MAP                               | 0.08      | [-0.04; 0.21]  | 0.176   |
| HR                                | -0.02     | [-0.11; 0.07]  | 0.663   |
| Propofol                          | 0.00      | [-0.01; 0.01]  | 0.777   |
| Norepinephrine                    | -1.24     | [-5.20; 2.72]  | 0.540   |
| Esketamine                        | 0.03      | [0.00; 0.05]   | 0.026   |
| NIHSS baseline                    | -0.36     | [-0.57; -0.15] | 0.001   |
| ASPECTS                           | -0.74     | [-1.66; 0.17]  | 0.111   |
| General anesthesia                | 2.95      | [-2.77; 8.67]  | 0.313   |
| <b>Post-recanalization phase</b>  |           |                |         |
| <b>SBP and DBP as covariables</b> |           |                |         |
| SBP                               | 0.12      | [0.03; 0.20]   | 0.006   |
| DBP                               | -0.12     | [-0.26; 0.02]  | 0.082   |
| HR                                | 0.01      | [-0.08; 0.10]  | 0.839   |
| Propofol                          | 0.00      | [-0.01; 0.02]  | 0.526   |
| Norepinephrine                    | -1.28     | [-5.15; 2.58]  | 0.515   |
| Esketamine                        | 0.03      | [0.01; 0.06]   | 0.017   |
| NIHSS baseline                    | -0.36     | [-0.56; -0.15] | 0.001   |
| ASPECTS                           | -0.84     | [-1.74; 0.07]  | 0.069   |
| General anesthesia                | 3.04      | [-2.63; 8.70]  | 0.294   |
| <b>MAP as covariable</b>          |           |                |         |
| MAP                               | 0.05      | [-0.05; 0.15]  | 0.344   |
| HR                                | -0.02     | [-0.11; 0.07]  | 0.675   |
| Propofol                          | 0.00      | [-0.01; 0.02]  | 0.756   |
| Norepinephrine                    | -1.55     | [-5.49; 2.39]  | 0.441   |
| Esketamine                        | 0.03      | [0.00; 0.05]   | 0.022   |
| NIHSS baseline                    | -0.36     | [-0.57; -0.15] | 0.001   |
| ASPECTS                           | -0.71     | [-1.63; 0.21]  | 0.129   |

|                            |       |                |        |
|----------------------------|-------|----------------|--------|
| General anesthesia         | 2.73  | [-3.06; 8.51]  | 0.355  |
| Post-intervention phase    |       |                |        |
| SBP and DBP as covariables |       |                |        |
| SBP                        | 0.07  | [-0.01; 0.16]  | 0.103  |
| DBP                        | -0.13 | [-0.28; 0.01]  | 0.076  |
| HR                         | 0.02  | [-0.06; 0.11]  | 0.577  |
| Propofol                   | 0.00  | [-0.01; 0.02]  | 0.682  |
| Norepinephrine             | -1.51 | [-5.35; 2.33]  | 0.442  |
| Esketamine                 | 0.03  | [0.01; 0.06]   | 0.011  |
| NIHSS baseline             | -0.39 | [-0.60; -0.19] | <0.001 |
| ASPECTS                    | -0.81 | [-1.70; 0.09]  | 0.077  |
| General anesthesia         | 2.43  | [-3.48; 8.33]  | 0.421  |
| MAP as covariable          |       |                |        |
| MAP                        | -0.01 | [-0.11; 0.09]  | 0.807  |
| HR                         | 0.00  | [-0.08; 0.09]  | 0.924  |
| Propofol                   | 0.00  | [-0.01; 0.01]  | 0.813  |
| Norepinephrine             | -1.36 | [-5.24; 2.51]  | 0.490  |
| Esketamine                 | 0.03  | [0.01; 0.06]   | 0.015  |
| NIHSS baseline             | -0.40 | [-0.61; -0.20] | <0.001 |
| ASPECTS                    | -0.87 | [-1.78; 0.03]  | 0.058  |
| General anesthesia         | 2.50  | [-3.47; 8.46]  | 0.412  |

ASPECTS, Alberta stroke program early CT score; DBP, diastolic blood pressure; HR, heart rate; MAP, mean arterial pressure; NIHSS, national institutes of health stroke scale; SBP, systolic blood pressure

Table VI. Change of blood pressure between different phases and its association with NIHSS change after 24 hours

|                                              | Estimates | 95% CI         | p-value |
|----------------------------------------------|-----------|----------------|---------|
| From baseline to pre-recanalization          |           |                |         |
| $\Delta$ SBP and $\Delta$ DBP as covariables |           |                |         |
| $\Delta$ SBP                                 | 0.01      | [-0.08; 0.10]  | 0.759   |
| $\Delta$ DBP                                 | 0.02      | [-0.12; 0.15]  | 0.812   |
| HR                                           | -0.01     | [-0.12; 0.09]  | 0.830   |
| Propofol                                     | 0.00      | [-0.01; 0.01]  | 0.904   |
| Norepinephrine                               | -1.71     | [-5.69; 2.27]  | 0.397   |
| Esketamine                                   | 0.03      | [0.01; 0.06]   | 0.016   |
| NIHSS baseline                               | -0.38     | [-0.59; -0.17] | 0.001   |
| ASPECTS                                      | -0.72     | [-1.65; 0.21]  | 0.127   |
| General anesthesia                           | 2.02      | [-3.85; 7.88]  | 0.497   |
| $\Delta$ MAP as covariable                   |           |                |         |
| $\Delta$ MAP                                 | 0.03      | [-0.06; 0.13]  | 0.492   |
| HR                                           | -0.01     | [-0.11; 0.10]  | 0.888   |
| Propofol                                     | 0.00      | [-0.01; 0.01]  | 0.899   |
| Norepinephrine                               | -1.71     | [-5.67; 2.25]  | 0.394   |
| Esketamine                                   | 0.03      | [0.01; 0.06]   | 0.015   |
| NIHSS baseline                               | -0.38     | [-0.59; -0.17] | 0.001   |
| ASPECTS                                      | -0.72     | [-1.64; 0.21]  | 0.127   |
| General anesthesia                           | 1.99      | [-3.83; 7.80]  | 0.500   |
| From baseline to post-recanalization         |           |                |         |
| $\Delta$ SBP and $\Delta$ DBP as covariables |           |                |         |
| $\Delta$ SBP                                 | 0.03      | [-0.10; 0.16]  | 0.663   |
| $\Delta$ DBP                                 | -0.01     | [-0.10; 0.08]  | 0.845   |
| HR                                           | 0.00      | [-0.01; 0.01]  | 0.955   |
| Propofol                                     | -1.55     | [-5.56; 2.45]  | 0.445   |
| Norepinephrine                               | 0.03      | [0.01; 0.06]   | 0.015   |
| Esketamine                                   | -0.38     | [-0.59; -0.17] | 0.001   |
| NIHSS baseline                               | -0.73     | [-1.65; 0.20]  | 0.122   |
| ASPECTS                                      | 1.76      | [-4.18; 7.71]  | 0.558   |
| General anesthesia                           | 0.01      | [-0.07; 0.09]  | 0.859   |
| $\Delta$ MAP as covariable                   |           |                |         |
| $\Delta$ MAP                                 | 0.04      | [-0.05; 0.12]  | 0.423   |
| HR                                           | -0.01     | [-0.10; 0.09]  | 0.882   |
| Propofol                                     | 0.00      | [-0.01; 0.01]  | 0.964   |
| Norepinephrine                               | -1.56     | [-5.54; 2.43]  | 0.441   |
| Esketamine                                   | 0.03      | [0.01; 0.06]   | 0.014   |
| NIHSS baseline                               | -0.38     | [-0.59; -0.17] | 0.001   |
| ASPECTS                                      | -0.72     | [-1.64; 0.20]  | 0.122   |
| General anesthesia                           | 1.82      | [-4.02; 7.67]  | 0.538   |
| From baseline to post-intervention           |           |                |         |
| $\Delta$ SBP and $\Delta$ DBP as covariables |           |                |         |
| $\Delta$ SBP                                 | 0.05      | [-0.02; 0.12]  | 0.134   |
| $\Delta$ DBP                                 | 0.02      | [-0.11; 0.14]  | 0.781   |
| HR                                           | -0.01     | [-0.09; 0.08]  | 0.891   |
| Propofol                                     | -0.00     | [-0.01; 0.01]  | 0.866   |
| Norepinephrine                               | -1.02     | [-5.03; 2.98]  | 0.614   |
| Esketamine                                   | 0.03      | [0.01; 0.06]   | 0.014   |
| NIHSS baseline                               | -0.77     | [-1.71; 0.17]  | 0.106   |
| ASPECTS                                      | -0.38     | [-0.59; -0.18] | <0.001  |
| General anesthesia                           | 1.17      | [-5.01; 7.36]  | 0.708   |
| $\Delta$ MAP as covariable                   |           |                |         |

|                    |       |                |        |
|--------------------|-------|----------------|--------|
| $\Delta$ MAP       | 0.09  | [0.01; 0.17]   | 0.036  |
| HR                 | -0.01 | [-0.09; 0.08]  | 0.866  |
| Propofol           | -0.00 | [-0.01; 0.01]  | 0.901  |
| Norepinephrine     | -1.14 | [-5.11; 2.83]  | 0.571  |
| Esketamine         | 0.03  | [0.01; 0.06]   | 0.010  |
| NIHSS baseline     | -0.73 | [-1.65; 0.20]  | 0.122  |
| ASPECTS            | -0.38 | [-0.59; -0.17] | <0.001 |
| General anesthesia | 0.77  | [-5.31; 6.85]  | 0.803  |

ASPECTS, Alberta stroke program early CT score; DBP, diastolic blood pressure; HR, heart rate; MAP, mean arterial pressure; NIHSS, national institutes of health stroke scale; SBP, systolic blood pressure



Table VII. Association of blood pressure drops of at least 20%, 30% and 40% during pre-recanalization vs baseline with early neurological and long-term outcome.

|                                                                                                      | Estimates | lower 95-CI limit | upper 95-CI limit | p-value |
|------------------------------------------------------------------------------------------------------|-----------|-------------------|-------------------|---------|
| <b>Association of &gt;20% intraprocedural blood pressure reduction with NIHSS change at 24 hours</b> |           |                   |                   |         |
| MAP reduction                                                                                        | -1.807    | -6.705            | 3.090             | 0.466   |
| SBP reduction                                                                                        | 2.404     | -2.483            | 7.291             | 0.332   |
| HR                                                                                                   | 0.112     | -1.427            | 1.652             | 0.885   |
| Propofol                                                                                             | 0.573     | -1.520            | 2.666             | 0.589   |
| Norepinephrine                                                                                       | -2.088    | -6.152            | 1.976             | 0.311   |
| Esketamine                                                                                           | 2.455     | 0.374             | 4.535             | 0.021   |
| NIHSS baseline                                                                                       | -2.899    | -4.637            | -1.161            | 0.001   |
| ASPECTS                                                                                              | -1.278    | -2.892            | 0.336             | 0.120   |
| General anesthesia                                                                                   | 2.683     | -3.563            | 8.928             | 0.397   |
| <b>Association of &gt;30% intraprocedural blood pressure reduction with NIHSS change at 24 hours</b> |           |                   |                   |         |
| MAP reduction                                                                                        | -1.241    | -6.050            | 3.567             | 0.610   |
| SBP reduction                                                                                        | 2.779     | -2.339            | 7.898             | 0.285   |
| HR                                                                                                   | 0.002     | -0.073            | 0.077             | 0.963   |
| Propofol                                                                                             | 0.003     | -0.012            | 0.017             | 0.717   |
| Norepinephrine                                                                                       | -2.084    | -6.140            | 1.972             | 0.311   |
| Esketamine                                                                                           | 0.032     | 0.006             | 0.057             | 0.017   |
| NIHSS baseline                                                                                       | -0.371    | -0.599            | -0.144            | 0.002   |
| ASPECTS                                                                                              | -0.768    | -1.723            | 0.187             | 0.114   |
| General anesthesia                                                                                   | 2.290     | -4.004            | 8.584             | 0.473   |
| <b>Association of &gt;40% intraprocedural blood pressure reduction with NIHSS change at 24 hours</b> |           |                   |                   |         |
| MAP reduction                                                                                        | 1.148     | -5.168            | 7.465             | 0.719   |
| SBP reduction                                                                                        | 0.366     | -6.979            | 7.711             | 0.922   |
| HR                                                                                                   | 0.008     | -1.516            | 1.532             | 0.992   |
| Propofol                                                                                             | 0.520     | -1.599            | 2.639             | 0.628   |
| Norepinephrine                                                                                       | -2.028    | -6.182            | 2.125             | 0.336   |
| Esketamine                                                                                           | 2.485     | 0.399             | 4.571             | 0.020   |
| NIHSS baseline                                                                                       | -2.723    | -4.444            | -1.003            | 0.002   |
| ASPECTS                                                                                              | -1.241    | -2.860            | 0.379             | 0.132   |
| General anesthesia                                                                                   | 2.256     | -3.918            | 8.429             | 0.471   |
|                                                                                                      | OR        | lower 95-CI limit | upper 95-CI limit | p-value |
| <b>Association of &gt;20% intraprocedural blood pressure reduction with mRS 0-2</b>                  |           |                   |                   |         |
| MAP reduction                                                                                        | 0.522     | 0.135             | 1.894             | 0.328   |
| SBP reduction                                                                                        | 2.976     | 0.805             | 12.069            | 0.110   |
| HR                                                                                                   | 0.976     | 0.783             | 1.200             | 0.824   |
| Propofol                                                                                             | 0.686     | 0.343             | 1.273             | 0.257   |
| Norepinephrine                                                                                       | 2.210     | 0.715             | 7.041             | 0.170   |
| Esketamine                                                                                           | 0.808     | 0.422             | 1.529             | 0.512   |
| NIHSS baseline                                                                                       | 0.883     | 0.821             | 0.943             | 0.000   |
| ASPECTS                                                                                              | 1.333     | 1.016             | 1.795             | 0.046   |
| General anesthesia                                                                                   | 0.522     | 0.056             | 3.455             | 0.522   |
| <b>Association of &gt;30% intraprocedural blood pressure reduction with mRS 0-2</b>                  |           |                   |                   |         |
| MAP reduction                                                                                        | 2.361     | 0.638             | 9.109             | 0.200   |
| SBP reduction                                                                                        | 0.653     | 0.153             | 2.586             | 0.548   |
| HR                                                                                                   | 0.938     | 0.750             | 1.153             | 0.557   |
| Propofol                                                                                             | 0.723     | 0.361             | 1.345             | 0.330   |
| Norepinephrine                                                                                       | 2.388     | 0.776             | 7.602             | 0.131   |
| Esketamine                                                                                           | 0.790     | 0.410             | 1.504             | 0.473   |
| NIHSS baseline                                                                                       | 0.893     | 0.831             | 0.953             | 0.001   |
| ASPECTS                                                                                              | 1.351     | 1.033             | 1.811             | 0.034   |

|                                                                           |       |       |        |       |
|---------------------------------------------------------------------------|-------|-------|--------|-------|
| General anesthesia                                                        | 0.383 | 0.039 | 2.545  | 0.352 |
| Association of >40% intraprocedural blood pressure reduction with mRS 0-2 |       |       |        |       |
| MAP reduction                                                             | 1.804 | 0.224 | 13.140 | 0.564 |
| SBP reduction                                                             | 0.648 | 0.064 | 5.764  | 0.697 |
| HR                                                                        | 0.957 | 0.772 | 1.170  | 0.676 |
| Propofol                                                                  | 0.713 | 0.362 | 1.319  | 0.300 |
| Norepinephrine                                                            | 2.383 | 0.764 | 7.606  | 0.135 |
| Esketamine                                                                | 0.831 | 0.438 | 1.558  | 0.562 |
| NIHSS baseline                                                            | 0.890 | 0.829 | 0.950  | 0.001 |
| ASPECTS                                                                   | 1.314 | 1.012 | 1.743  | 0.047 |
| General anesthesia                                                        | 0.520 | 0.059 | 3.236  | 0.508 |

ASPECTS, Alberta stroke program early CT score; HR, heart rate; MAP, mean arterial pressure; NIHSS, national institutes of health stroke scale; SBP, Systolic blood pressure

Table VIII. Blood pressure and its association with modified Rankin scale after 3 months

|                                   | OR   | 95% CI       | p-value |
|-----------------------------------|------|--------------|---------|
| <b>Baseline phase</b>             |      |              |         |
| <b>SBP and DBP as covariables</b> |      |              |         |
| SBP                               | 0.76 | [0.61; 0.95] | 0.015   |
| DBP                               | 1.12 | [0.78; 1.61] | 0.539   |
| HR                                | 0.94 | [0.74; 1.18] | 0.572   |
| NIHSS baseline                    | 0.41 | [0.25; 0.67] | <0.001  |
| ASPECTS                           | 1.31 | [1.00; 1.72] | 0.050   |
| General anesthesia                | 0.31 | [0.05; 2.06] | 0.225   |
| <b>MAP as covariable</b>          |      |              |         |
| MAP                               | 0.76 | [0.58; 1.00] | 0.050   |
| HR                                | 1.02 | [0.82; 1.25] | 0.885   |
| NIHSS baseline                    | 0.41 | [0.25; 0.68] | <0.001  |
| ASPECTS                           | 1.29 | [0.99; 1.69] | 0.060   |
| General anesthesia                | 0.50 | [0.09; 2.80] | 0.434   |
| <b>Pre-recanalization phase</b>   |      |              |         |
| <b>SBP and DBP as covariables</b> |      |              |         |
| SBP                               | 0.65 | [0.47; 0.91] | 0.011   |
| DBP                               | 1.19 | [0.70; 2.00] | 0.523   |
| HR                                | 0.83 | [0.63; 1.10] | 0.205   |
| Propofol                          | 0.98 | [0.94; 1.02] | 0.340   |
| Norepinephrine                    | 1.49 | [0.48; 4.63] | 0.494   |
| Esketamine                        | 0.87 | [0.41; 1.87] | 0.728   |
| NIHSS baseline                    | 0.39 | [0.23; 0.65] | <0.001  |
| ASPECTS                           | 1.40 | [1.05; 1.89] | 0.024   |
| General anesthesia                | 0.16 | [0.02; 1.36] | 0.093   |
| <b>MAP as covariable</b>          |      |              |         |
| MAP                               | 0.66 | [0.45; 0.96] | 0.030   |
| HR                                | 0.94 | [0.73; 1.20] | 0.608   |
| Propofol                          | 0.98 | [0.94; 1.02] | 0.429   |
| Norepinephrine                    | 1.74 | [0.57; 5.33] | 0.335   |
| Esketamine                        | 0.88 | [0.41; 1.86] | 0.730   |
| NIHSS baseline                    | 0.41 | [0.25; 0.67] | <0.001  |
| ASPECTS                           | 1.37 | [1.03; 1.81] | 0.030   |
| General anesthesia                | 0.23 | [0.03; 1.75] | 0.157   |
| <b>Post-recanalization phase</b>  |      |              |         |
| <b>SBP and DBP as covariables</b> |      |              |         |
| SBP                               | 0.84 | [0.66; 1.06] | 0.136   |
| DBP                               | 1.24 | [0.84; 1.82] | 0.274   |
| HR                                | 0.97 | [0.75; 1.25] | 0.792   |
| Propofol                          | 0.99 | [0.95; 1.03] | 0.498   |
| Norepinephrine                    | 1.87 | [0.62; 5.60] | 0.264   |
| Esketamine                        | 0.82 | [0.40; 1.69] | 0.599   |
| NIHSS baseline                    | 0.41 | [0.25; 0.67] | <0.001  |
| ASPECTS                           | 1.34 | [1.01; 1.77] | 0.042   |
| General anesthesia                | 0.27 | [0.04; 1.92] | 0.188   |
| <b>MAP as covariable</b>          |      |              |         |
| MAP                               | 0.95 | [0.71; 1.27] | 0.715   |
| HR                                | 1.02 | [0.80; 1.30] | 0.896   |
| Propofol                          | 0.99 | [0.95; 1.03] | 0.591   |
| Norepinephrine                    | 2.00 | [0.67; 5.99] | 0.217   |
| Esketamine                        | 0.82 | [0.40; 1.69] | 0.592   |
| NIHSS baseline                    | 0.42 | [0.26; 0.68] | <0.001  |

|                            |      |              |       |
|----------------------------|------|--------------|-------|
| ASPECTS                    | 1.29 | [0.99; 1.69] | 0.059 |
| General anesthesia         | 0.32 | [0.05; 2.15] | 0.242 |
| Post-intervention phase    |      |              |       |
| SBP and DBP as covariables |      |              |       |
| SBP                        | 0.85 | [0.66; 1.08] | 0.184 |
| DBP                        | 1.54 | [0.99; 2.40] | 0.055 |
| HR                         | 0.85 | [0.67; 1.09] | 0.203 |
| Propofol                   | 0.99 | [0.95; 1.03] | 0.466 |
| Norepinephrine             | 2.50 | [0.80; 7.81] | 0.113 |
| Esketamine                 | 0.71 | [0.35; 1.43] | 0.331 |
| NIHSS baseline             | 0.41 | [0.25; 0.67] | 0.001 |
| ASPECTS                    | 1.32 | [1.00; 1.75] | 0.050 |
| General anesthesia         | 0.45 | [0.06; 3.43] | 0.440 |
| MAP as covariable          |      |              |       |
| MAP                        | 1.10 | [0.83; 1.46] | 0.499 |
| HR                         | 0.91 | [0.72; 1.15] | 0.423 |
| Propofol                   | 0.99 | [0.95; 1.03] | 0.659 |
| Norepinephrine             | 2.13 | [0.70; 6.49] | 0.183 |
| Esketamine                 | 0.75 | [0.37; 1.51] | 0.423 |
| NIHSS baseline             | 0.45 | [0.28; 0.72] | 0.001 |
| ASPECTS                    | 1.34 | [1.03; 1.76] | 0.031 |
| General anesthesia         | 0.45 | [0.06; 3.15] | 0.420 |

ASPECTS, Alberta stroke program early CT score; DBP, diastolic blood pressure; HR, heart rate; MAP, mean arterial pressure; NIHSS, national institutes of health stroke scale; SBP, systolic blood pressure

Table IX. Change of blood pressure between different phases and its association with mRS at 3 months

|                                              | OR   | 95% CI       | p-value |
|----------------------------------------------|------|--------------|---------|
| From baseline to pre-recanalization          |      |              |         |
| $\Delta$ SBP and $\Delta$ DBP as covariables |      |              |         |
| $\Delta$ SBP                                 | 0.95 | [0.75; 1.20] | 0.642   |
| $\Delta$ DBP                                 | 1.12 | [0.78; 1.61] | 0.548   |
| HR                                           | 0.98 | [0.76; 1.27] | 0.891   |
| NIHSS baseline                               | 0.44 | [0.28; 0.71] | 0.001   |
| ASPECTS                                      | 1.27 | [0.98; 1.64] | 0.066   |
| General anesthesia                           | 0.39 | [0.07; 2.07] | 0.267   |
| $\Delta$ MAP as covariable                   |      |              |         |
| $\Delta$ MAP                                 | 1.02 | [0.78; 1.33] | 0.874   |
| HR                                           | 0.96 | [0.74; 1.25] | 0.785   |
| NIHSS baseline                               | 0.44 | [0.28; 0.70] | 0.001   |
| ASPECTS                                      | 1.26 | [0.97; 1.63] | 0.080   |
| General anesthesia                           | 0.40 | [0.08; 2.08] | 0.272   |
| From baseline to post-recanalization         |      |              |         |
| $\Delta$ SBP and $\Delta$ DBP as covariables |      |              |         |
| $\Delta$ SBP                                 | 0.93 | [0.75; 1.16] | 0.529   |
| $\Delta$ DBP                                 | 0.99 | [0.69; 1.42] | 0.939   |
| HR                                           | 1.07 | [0.84; 1.35] | 0.588   |
| NIHSS baseline                               | 0.45 | [0.28; 0.71] | 0.001   |
| ASPECTS                                      | 1.25 | [0.97; 1.62] | 0.080   |
| General anesthesia                           | 0.52 | [0.09; 2.85] | 0.445   |
| $\Delta$ MAP as covariable                   |      |              |         |
| $\Delta$ MAP                                 | 0.90 | [0.70; 1.14] | 0.376   |
| HR                                           | 1.06 | [0.83; 1.34] | 0.659   |
| NIHSS baseline                               | 0.44 | [0.28; 0.70] | 0.001   |
| ASPECTS                                      | 1.25 | [0.97; 1.61] | 0.090   |
| General anesthesia                           | 0.52 | [0.10; 2.79] | 0.439   |
| From baseline to post-intervention           |      |              |         |
| $\Delta$ SBP and $\Delta$ DBP as covariables |      |              |         |
| $\Delta$ SBP                                 | 0.88 | [0.71; 1.08] | 0.222   |
| $\Delta$ DBP                                 | 0.88 | [0.62; 1.25] | 0.464   |
| HR                                           | 0.97 | [0.77; 1.21] | 0.757   |
| NIHSS baseline                               | 0.42 | [0.26; 0.69] | 0.001   |
| ASPECTS                                      | 1.30 | [1.00; 1.70] | 0.052   |
| General anesthesia                           | 0.60 | [0.09; 3.84] | 0.592   |
| $\Delta$ MAP as covariable                   |      |              |         |
| $\Delta$ MAP                                 | 0.75 | [0.58; 0.98] | 0.032   |
| HR                                           | 0.96 | [0.77; 1.20] | 0.727   |
| NIHSS baseline                               | 0.42 | [0.26; 0.69] | 0.001   |
| ASPECTS                                      | 1.30 | [0.99; 1.70] | 0.055   |
| General anesthesia                           | 0.65 | [0.11; 3.91] | 0.642   |

ASPECTS, Alberta stroke program early CT score; DBP, diastolic blood pressure; HR, heart rate; MAP, mean arterial pressure; NIHSS, national institutes of health stroke scale; SBP, systolic blood pressure
